# Supplementary material for: Endemic Juniperus Montane Species Facing Extinction Risk under Climate Change in Southwest China: Integrative Approach for Conservation Assessment and Prioritization
Source: MDPI journal article supplement (doi:10.3390/biology10010063), 2021-01-17
Supplement: s1 [file s1]

Supplementary Materials

# Endemic *Juniperus* Montane Species Facing Extinction Risk under Climate Change in Southwest China: Integrative Approach for Conservation Assessment and Prioritization

Mohammed A. Dakhil, Marwa Waseem A. Halmy, Walaa A. Hassan, Ali El-Keblawy, Kaiwen Pan and Mohamed Abdelaal

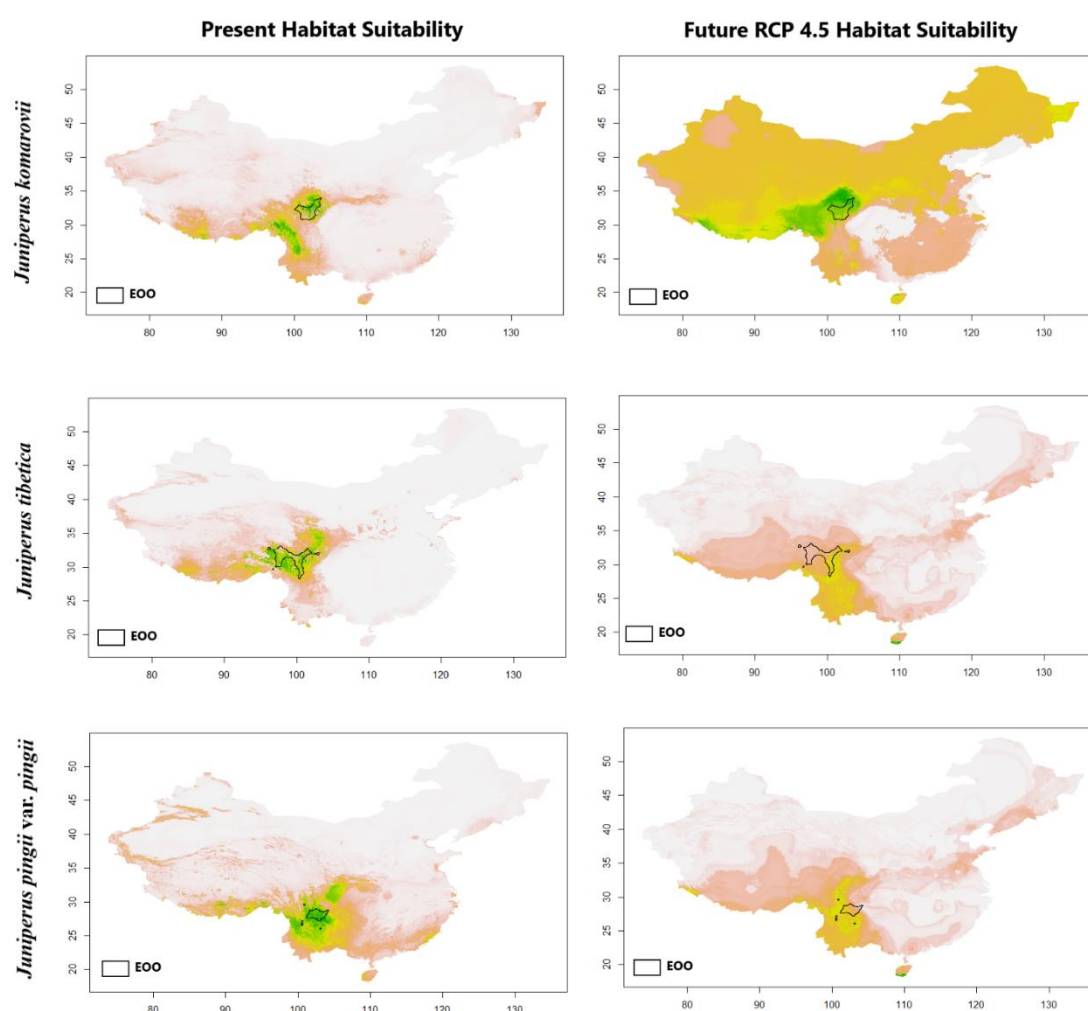

**Figure S1.** Potential habitat suitability maps of the three target *Juniperus* species under present and future (RCP 4.5) climatic scenarios. The green color indicate to suitable habitat. EOO is the extent of occurrence (EOO) of species.
